# Supplementary material
Source: PubMed Central journal article supplement (PMC3659943)
Supplement: supp_2012.071753_2012_071753-Contributions.pdf [file supp_2012.071753_2012_071753-Contributions.pdf]

**Manuscript no. HAEMATOL/2012/071753 entitled “Transcriptional regulation of miR-10a/b by TWIST-1 in myelodysplastic syndromes “**

**Authors: Xiang Li, Feng Xu, Chunkang Chang, John Byon, Thalia Papayannopoulou, H. Joachim Deeg, and A. Mario Marcondes**

**Information about the contributions of each person named as having participated in the study**

**1) Guarantor(s), i.e., person(s) who is (are) responsible for the integrity of the work as a whole:**

- Marcondes, Fred Hutchinson Cancer Research Center, mmarcond@fhcrc.org

According to the International Committee of Medical Journal Editors (ICMJE) ([http://www.icmje.org/ethical\\_1author.html](http://www.icmje.org/ethical_1author.html)): “Authorship credit should be based on: 1) substantial contributions to conception and design, acquisition of data, or analysis and interpretation of data; 2) drafting the article or revising it critically for important intellectual content; and 3) final approval of the version to be published. Authors should meet conditions 1, 2, and 3 ..... Acquisition of funding, collection of data, or general supervision of the research group alone does not constitute authorship”.

**The guarantors of this manuscript confirm that all persons designated as authors qualify for authorship, and that each author has participated sufficiently in the work to take public responsibility for appropriate portions of the content.**

**2) Authors who participated in the conception of the study: Li X, Xu F, Byon J, Deeg HJ, Marcondes AM**

**3) Design & Methods. The following authors were responsible for specific investigations (please detail):**

- Marcondes AM designed the Manuscript
- Li X co-design and provided critique of the manuscript.
- Papayannopoulou T contributed to the design and provided critique of the manuscript.

**4) Results. The following authors were responsible for specific portions of the results, including figures and tables (please indicate the person responsible for each figure and each table):**

- Li X carried out all the experiments
- Xu F co-carried out experiments
- Byon J co-carried out experiments
- Marcondes AM was responsible for conducting all the experiments

**5) Writing the manuscript. The following authors were responsible for writing the manuscript:**

- XL wrote the manuscript
- Xu F and Byon J co-carried out experiment
- Deeg JH co-wrote the manuscript
- Marcondes AM co-wrote the manuscript

**6) Contributors Listed in Acknowledgments:**

We thank Helen Crawford and Bonnie Larson for help with manuscript preparation and Nathan Elliot from NanoString Technologies for technical support. This work was supported by research funding from the National Institutes of Health, Bethesda, MD grants K08DK085156,

P01HL036444, R01HL095999. The content is solely the responsibility of the authors and does not necessarily represent the official views of the National Institutes of Health nor its subsidiary Institutes and Centers.
